# Supplementary material for: Attentional development can help us understand the inattentional blindness effect in visual search
Source: Frontiers journal article supplement (doi:10.3389/fcogn.2023.1134505), 2023-05-15
Supplement: Data_Sheet_1.docx [file Data_Sheet_1.docx]

**ANNEX A: *Binary Logistic Regressions****.*

The binary logistic regressions were separately performed for Letter and Word IB conditions with the predictors mentioned in the statistical analyses section within a unified model. For Letter, the model including all factors is not significant, as shown by the results of the Omnibus test [𝛘2(20)=28.33; p=.10; r2Nagelkerke =.15]. For Word, although the Omnibus test is significant [𝛘2(20)=67.97; p<.001; r2Nagelkerke =.32]; only inefficiency scores for target present was significant (p=.05). Remember that we are analyzing the binary logistic regression for a unified model, not considering a single one for each factor. A correlation analysis will give us indeed those results, and can also guide a more adequate unified model, including only those variables that have a bivariate correlation with the IB effect. The binary logistic regressions for bivariate comparisons is shown in Table A, with every associated correlation. In Table A, we can see the relation of each factor with the propensity to predict IB independently from each other. Significant effects are shadowed in the table.

Table A. Binary Logistic Regression with IB as the dependent variable and the rest of the variables represented as Factors in the Letter and Word IB conditions. Bivariate results.

As we can see in Table A, both for Letter and Word conditions, Age seems to be a significant factor explaining changes in the IB effect. On contrast, none of the factors related to IQ (general RIST performance, including both verbal and non-verbal components) produce an effect in either Letter or Word conditions. There are no differences due to gender either. For Letter, there were 65% of females and 62% of males showing IB effects, while for word, there were 50% of females and 48% for males.

For the CPT and VS factors, the results show several modulations, with all VS factors and several CPTs (Response Style, Misses, RTs, and Block-Change-RTs) being significant for Word. For Letter, only target present intercepts and inefficiency scores are significant for the VS task, and RTs for the CPT.

Thus, we run again binary logistic regressions only for those factors having an individual significant contribution to IB. Those models were now both significant both for Letter (Omnibus test [𝛘2(4)=10.17; p=.038; r2Nagelkerke =.054]) and Word (Omnibus test [𝛘2(11)=62.01; p<.001; r2Nagelkerke =.29]). However, when looking at the contribution to each factor to the unified model, none of them show significant contributions (all p>.05).

Even though there is a considerable reduction of factors, and the new regressions are theoretically guided by including only those factors that might have an individual contribution, probably the high collinearity among factors was again a problem to make the results understandable. Moreover, age seems to be a clear factor related to IB, but probably not linear. Indeed, we know it does not show a linear function, but a more logarithmic-like one in which changes are more abrupt at early stages, smoother at older ones, reaching an asymptote to stabilize between early adolescence and young ages depending on the executive function described, as they develop at different speeds (Gil-Gómez de Liaño et al., 2020; see also Fig.5). The approach to use a logistic regression for the whole sample, since some factors show no linear functions, might be also adding noise to the results. A better approach could be maybe to split the sample between younger and older observers, as we expect to see more linear modulations at younger ages, as the changes are more abrupt. Those analyses are shown, indeed in the results section of the manuscript.

**ANNEX B: *Complementary Analyses with IB as a non-binary ordinal measure****.*

As a complementary way to analyze the data, we considered the IB measure an ordinal variable in which we can recode the two IB letter/word measures as a single measure, ignoring the difference between the letter and word IB stimuli. As we have two IB measures per observer, we can compute a new dependent variable of IB propensity by coding observers into three different conditions. Those not showing IB in either measure are coded as “0”, those showing IB for one of the IB stimuli (letter or word) are coded as “1”, and those showing IB in both IB trials are coded as “2”. We tested this new ordinal variable using an ordinal regression within a logit function with all the factors tested in the previous binary logistic regression: age, sex, intelligence, CPT, and VS measures.

The main effect of age on IB using this variable are shown in Figure A. A clear decline in IB can be seen from age 4 to 9 with an asymptote thereafter. Statistically, the regression results show the model including all factors significant [𝛘2(20)=76.19; p<.001; r2Nagelkerke =.29], with variance proportion somewhere in between those found for binary logistic regressions for letter and word (see results from Annex A). Looking at the variance explained for each factor, those related to the visual search are the significant ones, including omissions (p=.02), inefficiency scores (p=.04 & p=.001, for absent and present conditions respectively), slopes (p=.03 & p=.006, again absent and present respectively), and intercepts for present conditions (p=.005). However, the confidence intervals lay close to including zero, showing that the effects are relatively small. Indeed, the results are very similar to those found for the Word condition in Annex B, with the exception of Age, which seems not to be significant in the present ordinal regression (p=.10). However, as with most of the results shown in the manuscript, this seems to be because age effects follow more logistic functions, with more abrupt changes until 9 years, and a plateau from 9 years and up. Splitting the sample, we replicate the results presented in the manuscript: a significant ordinal regression for younger <9 years observers [𝛘2(20)=54.19; p<.001; r2Nagelkerke =.41], but not for those over 9 years [𝛘2(20)=22.13; p=.33; r2Nagelkerke =.17]; but, importantly, with age being now significant for those below 9 years (p=.002), but not for the older above 9 years (p=.68). As we can see in Figure A, age effects again replicate those found in the paper, showing a similar function as that found for binary IB variables (see Figure 2 for comparisons). The ANOVA with age in bins also replicates the results, showing a main effect of age [F(10,266)=6.28; p<.001; ηp2=.19], with all the action happening again below 9 years. Finally, the results for the rest of the visual search variables are similar to those found before for younger observers, below 9-years old. For the observers above 9-years old, the effects of visual search factors only show up for present target conditions and omissions, similar to previous results.


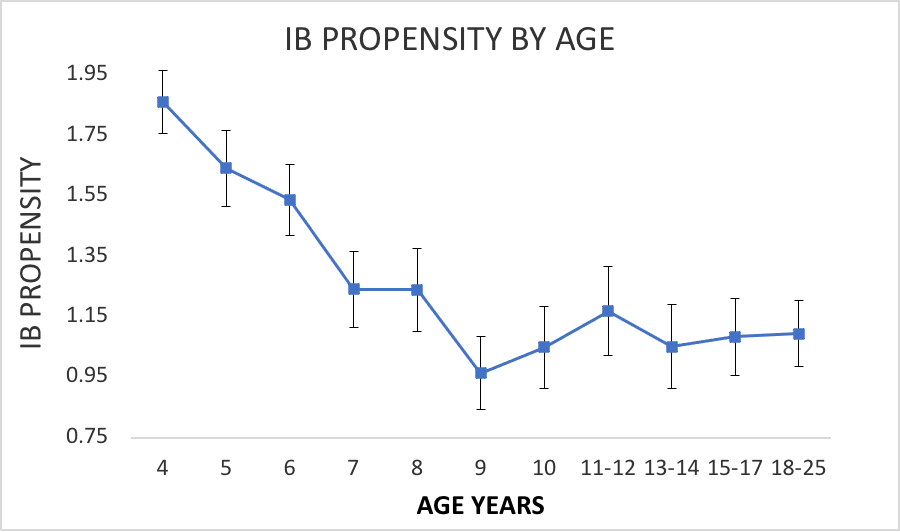


**Figure A. Inattentional Blindness Mean Propensity (from 0 to 2) by Age.**
